# Supplementary material for: Subthalamic Nucleus Deep Brain Stimulation Treats Parkinson’s Disease Patients with Cardiovascular Disease Comorbidity: A Retrospective Study of a Single Center Experience
Source: MDPI journal article supplement (doi:10.3390/brainsci13010070), 2022-12-29
Supplement: s1 [file s1]

**Table S1.** Electrocardiogram, Echocardiography.

ASA classification and RCRI results

| Case | ASA<br>classification | RCRI<br>index | LVPWT<br>(mm) | EF% | Heart rate<br>(bpm) | RV5+SV1<br>(mV) | ECG                                                                                                                               |
|------|-----------------------|---------------|---------------|-----|---------------------|-----------------|-----------------------------------------------------------------------------------------------------------------------------------|
| 1    | 3                     | 0             | 11            | 70  | 97                  | 1.86            | normal ECG                                                                                                                        |
| 2    | 2                     | 0             | 8             | 75  | 78                  | 2.74            | normal ECG                                                                                                                        |
| 3    | 3                     | 0             | 8             | 71  | 73                  | 1.97            | normal ECG                                                                                                                        |
| 4    | 3                     | 0             | 9             | 73  | 76                  | 1.08            | Sinus heart rate, abnormal Q waves                                                                                                |
| 5    | 3                     | 0             | 9             | 67  | 85                  | 2.35            | normal ECG                                                                                                                        |
| 6    | 3                     | 1             | 9             | 73  | 78                  | 1.5             | Sinus heart rate, abnormal Q waves                                                                                                |
| 7    | 3                     | 1             | 9             | 64  | 102                 | 2.39            | sinus tachycardia with atrial<br>premature beat bigemine and mild<br>ST-T changes                                                 |
| 8    | 3                     | 0             | 10            | 74  | 88                  | 1.48            | normal ECG                                                                                                                        |
| 9    | 3                     | 0             | 9             | 74  | 69                  | 3.04            | normal ECG                                                                                                                        |
| 10   | 3                     | 0             | 9             | 67  | 105                 | 3.37            | Sinus tachycardia with mild ST<br>changes                                                                                         |
| 11   | 3                     | 0             | 9             | 73  | 68                  | 2.2             | normal ECG                                                                                                                        |
| 12   | 3                     | 1             | 9             | 66  | 88                  | 2               | normal ECG                                                                                                                        |
| 13   | 3                     | 0             | 10            | 76  | 68                  | 2.53            | normal ECG                                                                                                                        |
| 14   | 3                     | 0             | 9             | 74  | 71                  | 2.72            | normal ECG                                                                                                                        |
| 15   | 3                     | 1             | 10            | 70  | 72                  | 2.34            | normal ECG                                                                                                                        |
| 16   | 3                     | 0             | 10            | 62  | 71                  | 2.88            | Sinus heart rate with atrial<br>premature beats and mild ST-T<br>changes                                                          |
| 17   | 3                     | 1             | 9             | 76  | 55                  | 2.94            | sinus bradycardia                                                                                                                 |
| 18   | 3                     | 0             | 9             | 73  | 87                  | 3.16            | normal ECG                                                                                                                        |
| 19   | 3                     | 1             | 9             | 66  | 56                  | 2.54            | sinus bradycardia                                                                                                                 |
| 20   | 3                     | 0             | 11            | 67  | 60                  | 1.8             | Atrial pacing rhythm, prolonged AV<br>conduction, incomplete right bundle<br>branch block, and left anterior<br>fascicular block. |
| 21   | 3                     | 0             | 9             | 73  | 85                  | 2.07            | Sinus heart rate with abnormal Q<br>waves                                                                                         |
| 22   | 3                     | 1             | 9             | 61  | 69                  | 3.47            | Sinus bradycardia, premature<br>ventricular contractions                                                                          |
| 23   | 3                     | 0             | 7             | 64  | 71                  | 1.96            | Sinus rhythm, complete right bundle<br>branch block                                                                               |
| 24   | 3                     | 0             | 9             | 63  | 102                 | 2.14            | sinus tachycardia                                                                                                                 |
| 25   | 3                     | 1             | 9             | 58  | 93                  | 3.21            | Atrial fibrillation with mild T-wave<br>changes                                                                                   |
| 26   | 3                     | 2             | 8             | 75  | 74                  | 2.62            | normal ECG                                                                                                                        |

|         |           |           |             |                 |                  |             |                                    |
|---------|-----------|-----------|-------------|-----------------|------------------|-------------|------------------------------------|
| 27      | 3         | 1         | 10          | 71              | 83               | 3.34        | normal ECG                         |
| 28      | 3         | 1         | 9           | 73              | 71               | 2.72        | normal ECG                         |
| 29      | 3         | 1         | 9           | 67              | 63               | 2.81        | normal ECG                         |
| 30      | 3         | 2         | 8           | 73              | 85               | 2.27        | normal ECG                         |
| 31      | 3         | 2         | 10          | 70              | 78               | 2.74        | sinus bradycardia                  |
| 32      | 3         | 3         | 10          | 61              | 91               | 3.05        | Sinus heart rate, abnormal Q waves |
| 33      | 3         | 2         | 9           | 72              | 69               | 2.99        | normal ECG                         |
| 34      | 3         | 1         | 8           | 76              | 76               | 2.82        | normal ECG                         |
| 35      | 3         | 2         | 10          | 72              | 68               | 3.01        | sinus bradycardia                  |
| 36      | 3         | 2         | 10          | 63              | 89               | 2.40        | normal ECG                         |
| 37      | 3         | 1         | 9           | 72              | 88               | 2.52        | sinus bradycardia                  |
| 38      | 3         | 1         | /           | /               | 82               | /           | /                                  |
| Average | 2.97±0.16 | 0.76±0.82 | 9.16 ± 0.83 | 69.59 ±<br>4.96 | 78.53 ±<br>12.41 | 2.51 ± 0.57 |                                    |

Numbers indicate means ± standard deviations (SD). ASA: American Society of Anesthesiologists, RCRI: Revised Cardiac Risk Index , LVPWT :Left Ventricular Posterior Wall Thickness, EF: ejection fraction. bpm, beats per minute. ECG: Electrocardiograph ,RV5: R-wave in lead V5, SV1: S-wave in lead V1.AV: atrioventricular ."/ " means data lost.
